# Supplementary material for: Whole genome association study identifies regions of the bovine genome and biological pathways involved in carcass trait performance in Holstein-Friesian cattle
Source: PubMed Central journal article supplement (PMC4192274; doi:10.1186/1471-2164-15-837), 2014-10-01

# PPAR SIGNALING PATHWAY

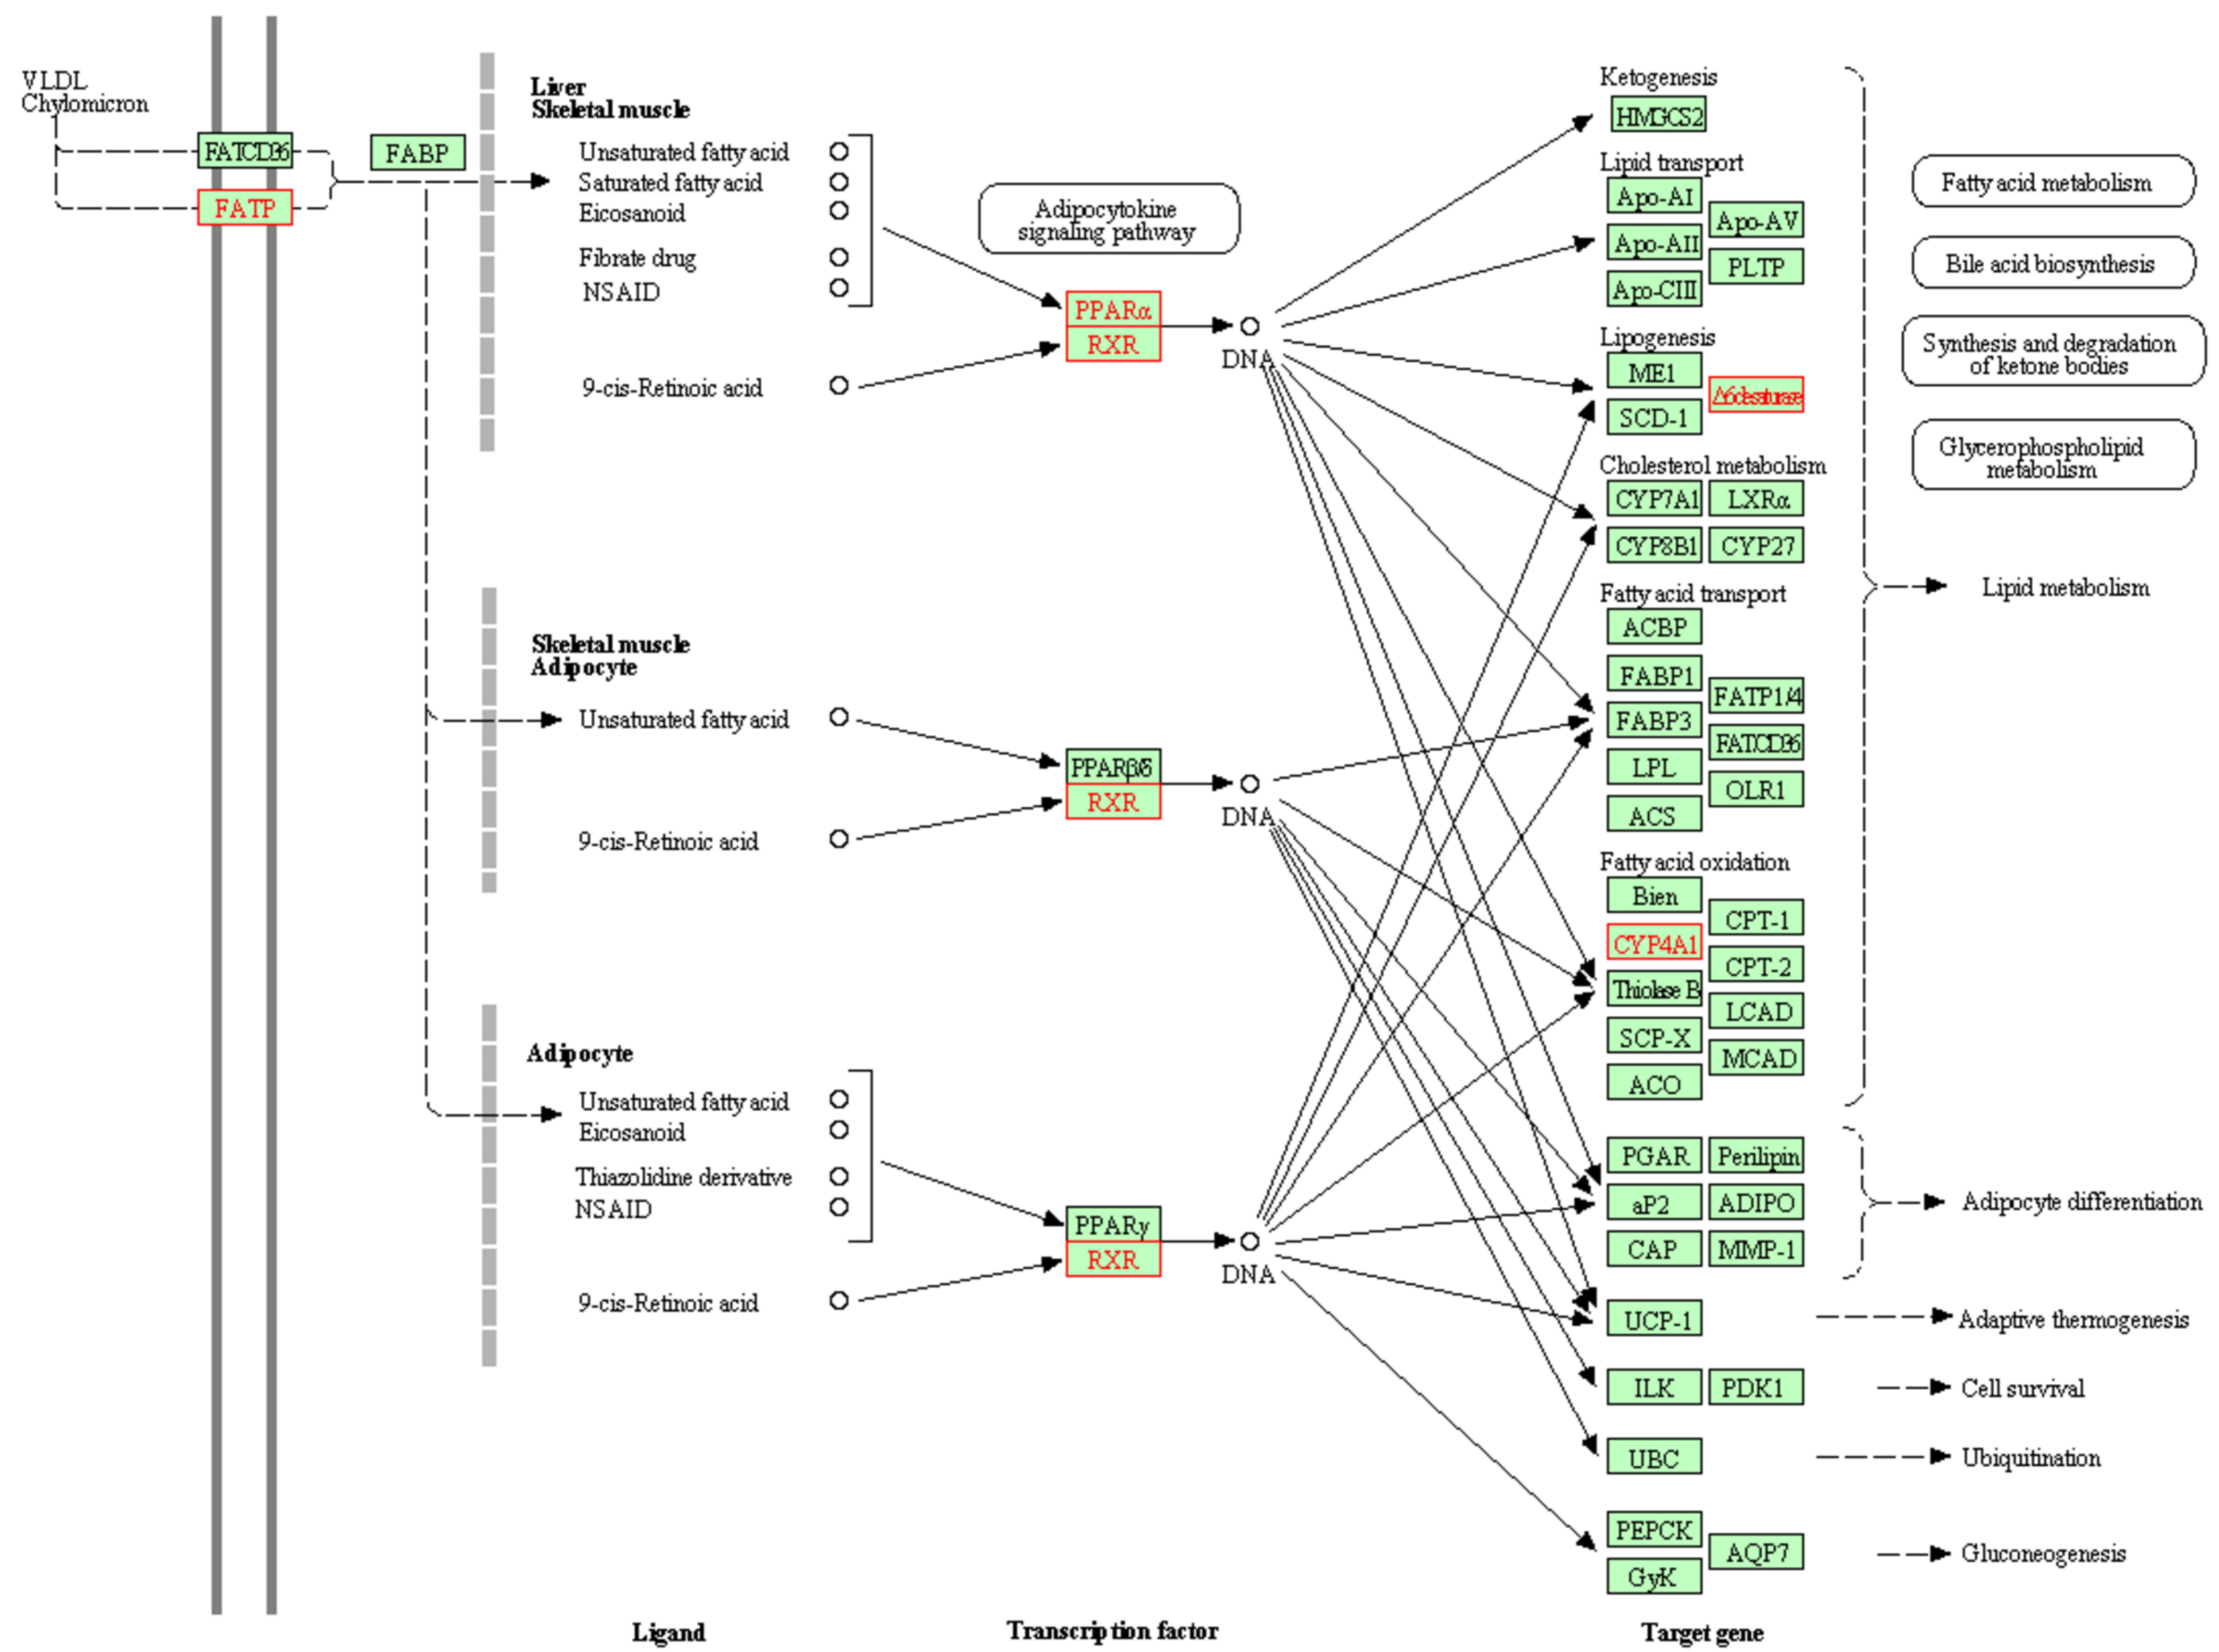

Supplement: 12864_2013_6513_MOESM7_ESM.pdf [file 12864_2013_6513_MOESM7_ESM.pdf]
